# Supplementary material
Source: PubMed Central journal article supplement (PMC7484130)
Supplement: NIHMS1609167-supplement-1.pdf [file NIHMS1609167-supplement-1.pdf]

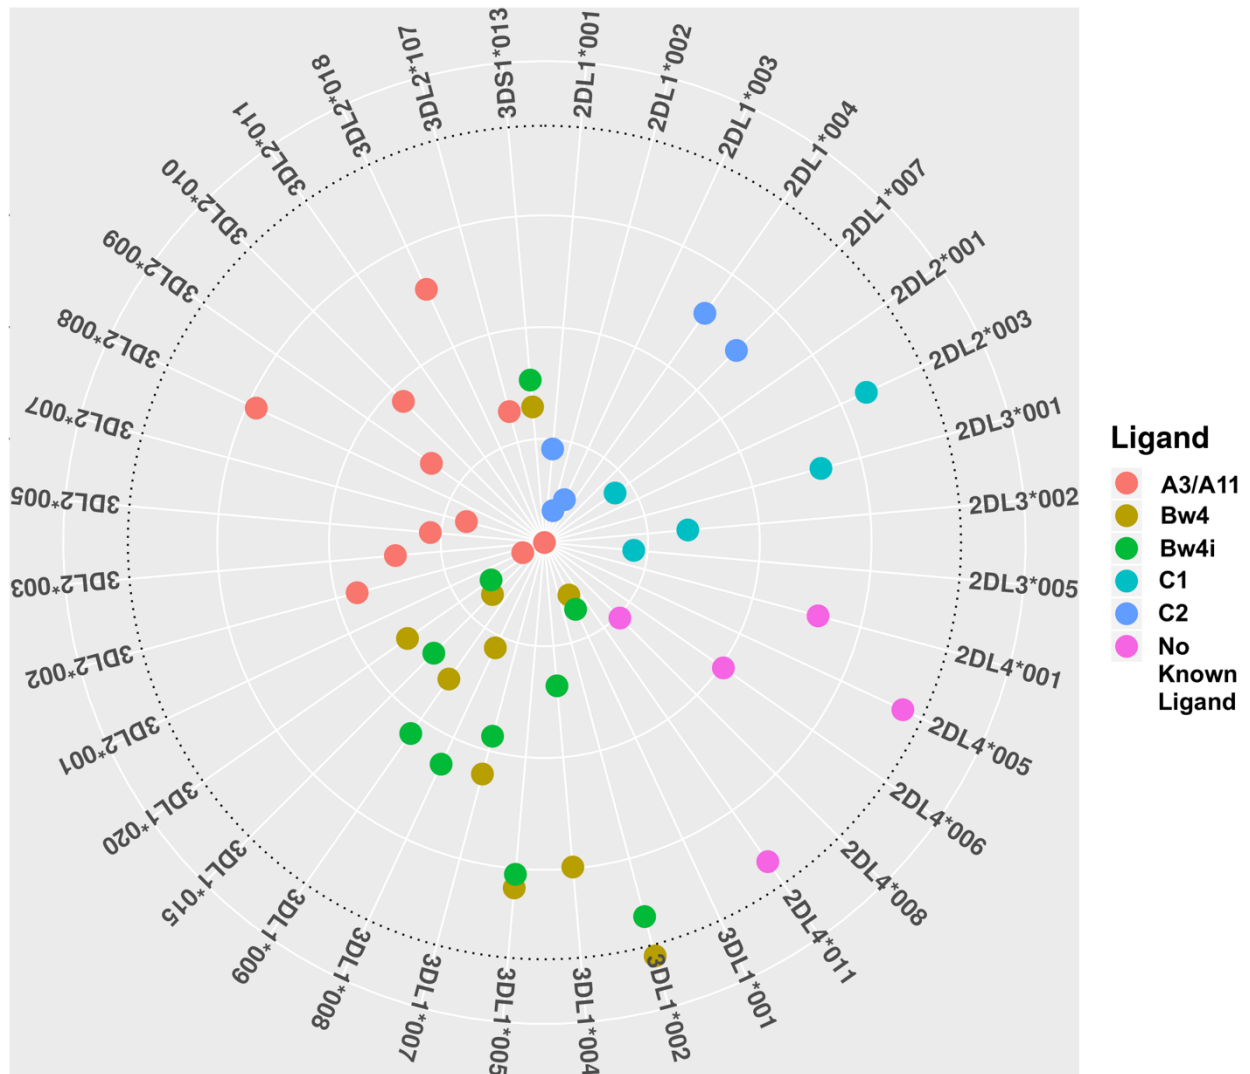

**Supplementary Figure 1. KIR allele/HLA ligand pairs in PD cases and controls.**

Uncorrected p-values for *KIR* alleles with their corresponding ligands. Each allele/ligand pair is represented by a circle and each grid line indicates the KIR allele. Respective ligands are shown by color: HLA-A3/A11 (red), HLA-Bw4 (brown), HLA-Bw4i (green), HLA-C1 (cyan), HLA-C2 (blue) and no known ligand (pink). The distance from the center of the circle is  $1 - p$ -value. A p-value of 1 lies in the center of the circle and an uncorrected p-value of 0.05 is indicated by the dotted line around the circle.

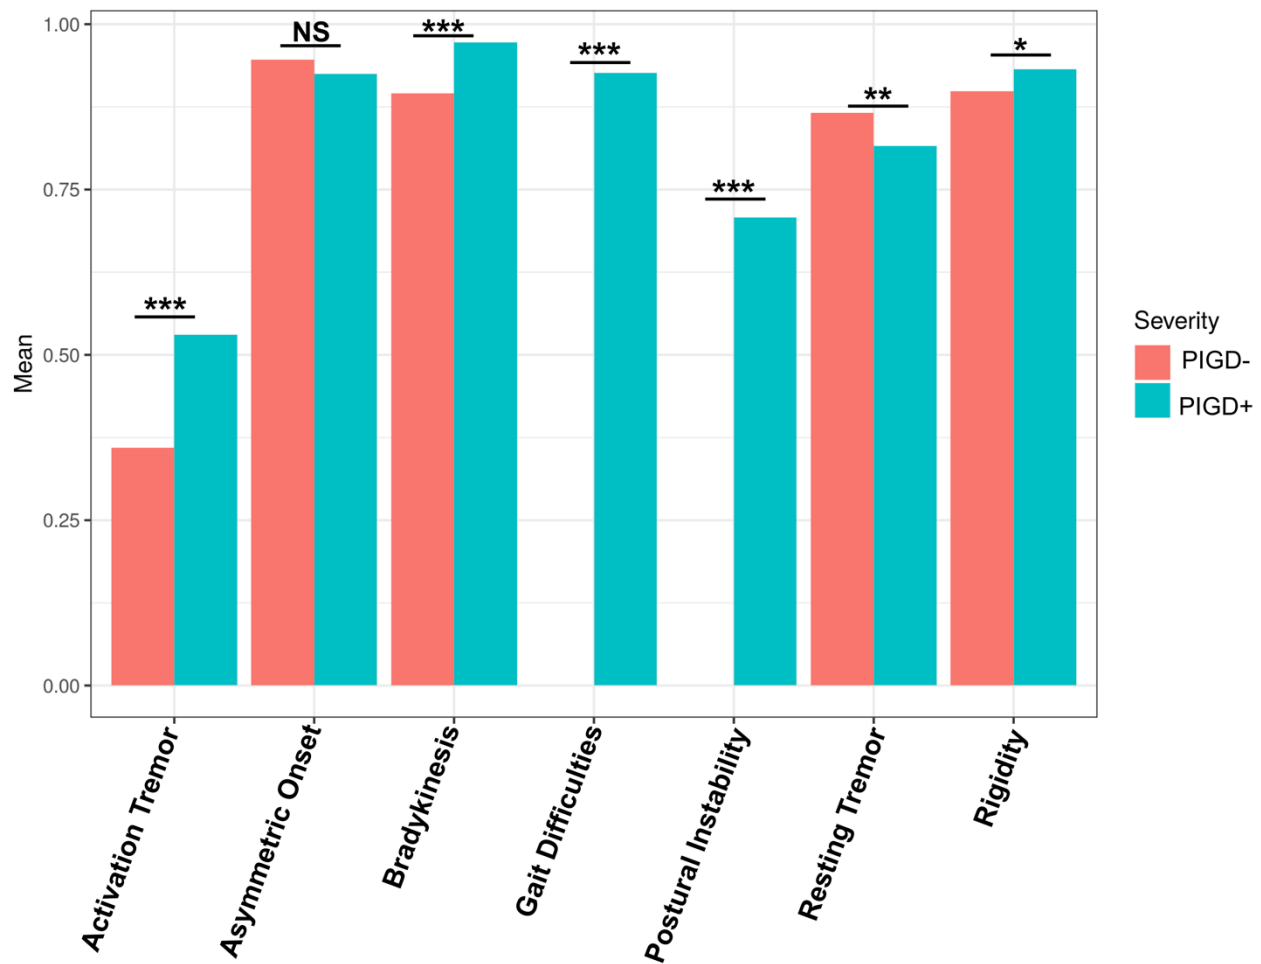

**Supplementary Figure 2. Symptoms present in manually clustered groups of PD patients.**

Mean number of patients (y – axis) presenting specific symptoms (x – axis) in “mild” (red bars) and “severe” (blue bars) PD categories. Means between groups were compared by t-test, p-value significance levels indicated below. For detailed information, see Supplementary Table 2.

\*  $p < 0.05$   
 \*\*  $p < 0.001$   
 \*\*\*  $p < 1 \times 10^{-5}$

|                      | <b>PIGD-</b><br><b>mean(sd)</b> | <b>PIGD+</b><br><b>mean(sd)</b> | <b>p-value</b>        |
|----------------------|---------------------------------|---------------------------------|-----------------------|
| Activation Tremor    | 0.36 (0.48)                     | 0.53 (0.50)                     | 5.3x10 <sup>-8</sup>  |
| Asymmetric Onset     | 0.95 (0.22)                     | 0.93 (0.26)                     | 0.0829                |
| Bradykinesia         | 0.89 (0.31)                     | 0.97 (0.16)                     | 9.5x10 <sup>-8</sup>  |
| Gait Difficulties    | 0.00 (0.00)                     | 0.93 (0.26)                     | 2.2x10 <sup>-16</sup> |
| Postural Instability | 0.00 (0.00)                     | 0.71 (0.46)                     | 2.2x10 <sup>-16</sup> |
| Resting Tremor       | 0.87 (0.34)                     | 0.82 (0.39)                     | 0.0057                |
| Rigidity             | 0.90 (0.30)                     | 0.93 (0.25)                     | 0.0395                |

**Supplementary Table 2. Symptoms present in manually clustered groups of PD patients.**  
For data visualization, see Supplementary Figure 2.
